# Supplementary material
Source: Springer Nature journal article supplement (https://www.springermedizin.de/resource/supplementary/12943_2012_1070_MOESM3_ESM.pdf/9552220)

**a**

Ad315-E1A

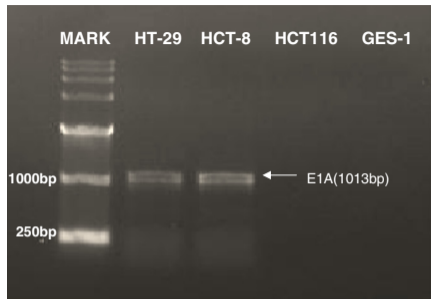

H101

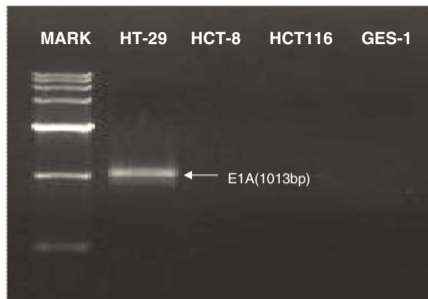**b**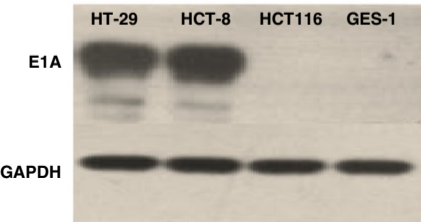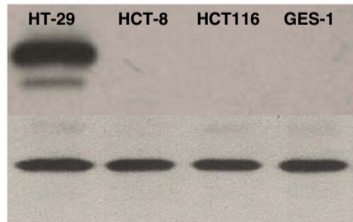

Supplement: MOESM3 [file 9552220]
